# 1 **Metabolite sequestration enables rapid recovery from nutrient depletion**

2 Christopher J. Hartline<sup>1,†</sup>, Ahmad A. Mannan<sup>2,†</sup>, Di Liu<sup>1</sup>, Fuzhong Zhang<sup>1,\*</sup>, Diego A.

3 Oyarzún<sup>3,4,\*</sup>

4 <sup>1</sup> Department of Energy, Environmental & Chemical Engineering, Washington

5 University in St Louis, St. Louis, 63130, USA

6 <sup>2</sup> Warwick Integrative Synthetic Biology Centre & School of Engineering,

7 University of Warwick, Coventry CV4 7AL, UK

8 <sup>3</sup> School of Informatics, University of Edinburgh, Edinburgh EH8 9AB, UK

9 <sup>4</sup> School of Biological Sciences, University of Edinburgh, Edinburgh EH9 3BF, UK

10 † Equal contribution

11 \* Corresponding authors: F. Zhang ([fzhang@seas.wustl.edu](mailto:fzhang@seas.wustl.edu)) and D. A. Oyarzún

12 ([d.oyarzun@ed.ac.uk](mailto:d.oyarzun@ed.ac.uk)).

13

14

15

16

17

18

19

20

21

22

23

## 1 **Abstract**

2 Microbes adapt their metabolism to take advantage of nutrients in their environment. Such  
3 adaptations control specific metabolic pathways to match energetic demands with nutrient  
4 availability. Upon depletion of nutrients, rapid pathway recovery is key to release cellular  
5 resources required for survival in the new nutritional condition. Yet little is known about the  
6 regulatory strategies that microbes employ to accelerate pathway recovery in response to nutrient  
7 depletion. Using the fatty acid catabolic pathway in *Escherichia coli*, here we show that fast  
8 recovery can be achieved by rapid release of a transcriptional regulator from a metabolite-  
9 sequestered complex. With a combination of mathematical modelling and experiments, we show  
10 that recovery dynamics depend critically on the rate of metabolite consumption and the exposure  
11 time to nutrient. We constructed strains with re-wired transcriptional regulatory architectures that  
12 highlight the metabolic benefits of negative autoregulation over constitutive and positive  
13 autoregulation. Our results have wide-ranging implications for our understanding of metabolic  
14 adaptations, as well as guiding the design of gene circuitry for synthetic biology and metabolic  
15 engineering.

16

17

18

19

20

21

22

23

## 1 **Introduction**

2 Bacteria constantly adapt to changing environments by coordinating multiple levels of their  
3 intracellular machinery. Metabolic regulation provides a control layer that adapts metabolic  
4 activity to nutritional conditions. Such regulation relies on a complex interplay between gene  
5 expression and metabolic pathways [1]. In the case of metabolic pathways, genes for nutrient  
6 uptake and consumption need to be upregulated when the specific nutrient is available in the  
7 environment. Failure to quickly increase pathway capacity may result in missed metabolic resource  
8 opportunity and a potential cost on fitness [2] and population survival [3]–[5]. Conversely, upon  
9 nutrient depletion, expression of specific metabolic enzymes can become wasteful and lead to a  
10 suboptimal use of biosynthetic resources [6], [7].

11 Metabolite-responsive transcription factors are a widespread regulatory mechanism in  
12 microbes. Upon sensing nutrient availability, they trigger changes in enzyme expression and  
13 metabolic flux [8]. This strategy has been shown to control the dynamics of pathway upregulation  
14 in various ways [9]–[11]. For example, negative autoregulation of transcription factors can speed  
15 the response time of gene expression [12] and feedback circuits based on metabolite-responsive  
16 transcription factors have been demonstrated to accelerate metabolite responses [13]. While much  
17 of the literature has focused on the control of activation dynamics upon nutrient induction [14]–  
18 [16], little is known on how these regulatory mechanisms shape pathway recovery after depletion  
19 of nutrients.

20 Here we study a common regulatory architecture found in over a dozen bacterial nutrient  
21 uptake systems [17] (Figure 1A and Table S1). When a nutrient is absent from the environment, a  
22 metabolite-responsive transcription factor (MRTF) represses the expression of uptake and  
23 catabolic enzymes. When the nutrient is present, the nutrient is internalized and sequesters the

1 transcription factor via reversible binding, thus preventing gene repression. This causes an  
2 upregulation of metabolic enzyme genes and an increase in the rate of nutrient import and  
3 utilization. A common feature of these control systems is the presence of negative autoregulation  
4 of the transcription factor (Supplementary Information S1). After nutrient depletion, the MRTF  
5 must recover its repressive activity on the catabolic pathway genes to rapidly shut down pathway  
6 activity, yet it is unclear what components of the regulatory system help to accelerate the recovery  
7 dynamics.

8 Using the *Escherichia coli* fatty acid catabolic pathway as our model system, we took a  
9 theoretical-experimental approach to study its recovery dynamics in response to a nutrient shift  
10 from an ON-state to an OFF-state. As illustrated in Figure 1B, these two states are defined as an  
11 environment with and without the presence of oleic acid as carbon source, respectively. In the ON-  
12 state, oleic acid is imported as fatty acyl-CoA which binds to the transcription factor FadR and  
13 sequesters it into a complex. This acyl-CoA sequestration releases FadR from its cognate DNA  
14 elements [18], which relieves the repression of the uptake gene *fadD* and thus accelerates the  
15 import of oleic acid. We found that upon depletion of oleic acid, repression by FadR is recovered  
16 via its rapid release from the sequestered complex, which in turn is driven by consumption of acyl-  
17 CoA. We further found that the architecture of FadR autoregulation affects the maintenance of a  
18 sequestered pool of FadR. In particular, negative autoregulation enables a large sequestered TF  
19 pool during the ON-state and, at the same time, a reduced biosynthetic cost in the OFF-state. Our  
20 results shed light on the regulatory mechanisms that allow cells to rapidly adapt to environmental  
21 shifts and provide insights for the design of gene circuits in synthetic biology and metabolic  
22 engineering applications, particularly where strain performance is sensitive to nutrient fluctuations  
23 and inhomogeneities typical of large-scale fermentations.

1

## 2 **Results**

### 3 **Recovery dynamics in the fatty acid uptake system**

4 To study the recovery dynamics of fatty acid uptake, we built a kinetic model based on four core  
5 components of the regulatory system: FadD (*D*), free FadR (*R*), acyl-CoA (*A*) and sequestered  
6 FadR (*aR*). The model represents cells growing at a fixed growth rate with oleic acid at a fixed  
7 concentration in the media. We simulated the recovery dynamics by mimicking the three stages in  
8 our experimental setup: preculture without oleic acid, response to induction in the ON-state, and  
9 recovery in the OFF-state. During preculture we ran the model to steady state in the absence of  
10 oleic acid, then initiated simulations of the ON-state from the steady state achieved in preculture,  
11 with a fixed concentration of oleic acid for a defined exposure time. The concentrations achieved  
12 at the end of the ON-state were used as initial conditions for the OFF-state, which was simulated  
13 without oleic acid until the system recovers to the steady state in preculture (Figure 1C).

14 We defined two metrics to quantify the recovery dynamics after the switch from ON- to  
15 OFF-state (Figure 1C). First, we define the recovery time ( $\tau_{50}$ ) as the time taken for FadD to  
16 decrease to half-way between its maximum and minimum steady state value after nutrient  
17 depletion (Figure 1C). Second, we defined the metric  $\eta$  as the proportion of free FadR released  
18 from the sequestered complex after one doubling time:

$$19 \quad \eta = \frac{FadR_{DT} - FadR_{DT-new}}{FadR_{DT}},$$

20 where  $FadR_{DT}$  and  $FadR_{DT-new}$  are the concentrations of free FadR and newly expressed FadR in  
21 the OFF-state after one doubling time (DT). This definition allows us to quantify the contribution  
22 of free FadR released from the sequestered pool to the recovery dynamics.

1            Since pathway recovery depends on the system state at the time of the ON to OFF switch,  
2 we used the kinetic model to study the relation between the initial conditions at the time of the  
3 switch and the recovery dynamics. To this end, we studied the impact of exposure time to oleic  
4 acid during the ON-state, as well as the amount of acyl-CoA-consuming enzyme. We simulated  
5 the OFF-state dynamics for 2500 combinations of 50 acyl-CoA-consuming enzyme concentrations  
6 and 50 exposure times, and calculated  $\tau_{50}$  and  $\eta$  for each. Simulation results of the OFF-state  
7 dynamics (Figure 2A) suggest that the recovery time ( $\tau_{50}$ ) decreases with increasing concentrations  
8 of consuming enzyme, while the amount of released FadR ( $\eta$ ) increases with both the consuming  
9 enzyme and the exposure time. Further simulations suggest that when exposure time increases, the  
10 pool of acyl-CoA accumulates further which takes a longer time to be consumed in the OFF-state.  
11 This delays the release of FadR from the complex and results in a longer recovery time (details in  
12 Supplementary Information S3 and Figure S2). Model simulations also reveal a strong inverse  
13 relation between  $\tau_{50}$  and  $\eta$  (Figure 2B), indicating that the release of FadR from sequestration by  
14 acyl-CoA provides a mechanism for cells to achieve rapid recovery during nutrient depletion.  
15 Further, the sensitivity of this inverse relation increases when cells are exposed to a longer ON-  
16 state. Simulations show that longer cell exposure times to oleic acid increase the pool of  
17 sequestered FadR (Figure S2). Consequently, in the OFF-state, more FadR can be released from  
18 sequestration compared to new FadR synthesis, thus increasing the sensitivity of  $\tau_{50}$  changes in the  
19 amount of released FadR ( $\eta$ ).

20            To verify the model predictions, we sought to experimentally perturb the fraction of released  
21 FadR ( $\eta$ ) through two complementary strategies: i) by engineering strains with different amounts  
22 of acyl-CoA consuming enzymes, and ii) by manipulating the exposure time to oleic acid. We first  
23 constructed a reporter strain with a decreased consumption rate of acyl-CoA, strain  $\Delta$ fadE-reporter

1 (see Supplementary Information S4 and Table S5), where we deleted the *fadE* gene encoding the  
2 second step of the fatty acid  $\beta$ -oxidation pathway. This prevents metabolization of acyl-CoA by  $\beta$ -  
3 oxidation, and leaves membrane incorporation (catalyzed by enzyme PlsB) as the only pathway  
4 for acyl-CoA consumption. We measured *fadD* expression dynamics after switching the strains  
5 from the ON-state (M9G + 1mM oleic acid media) to OFF-state (M9G media) using a red  
6 fluorescent protein (RFP) reporter fused downstream of the *fadD* promoter. The *fadE* knockout  
7 strain displayed a slower recovery than the wild type, with ~60% increase in recovery time (Figure  
8 2D), confirming our theoretical prediction in Figure 2C. The measured increase in recovery time  
9 entails an increased expenditure of biosynthetic resources to import a metabolite that is no longer  
10 present in the environment.

11 Next, we measured the *fadD* recovery dynamics after switching the cultures from growth with  
12 3, 6, and 9 hours of exposure time in the ON-state. As predicted from the model in (Figure 2E),  
13 measured recovery time decreased for an increase in exposure time (Figure 2F). However, we  
14 observe that recovery time is not decreased further beyond 6 hours of exposure to oleic acid. We  
15 speculate that faster recovery is counteracted by the delay of having to consume a higher level of  
16 accumulated acyl-CoA, or because the maximum level of sequestered FadR may already have  
17 been achieved at 6 hours.

18

### 19 **Impact of autoregulatory architecture on recovery dynamics**

20 Among the uptake systems in *E. coli* with the architecture of Figure 1A, we found that the majority  
21 have a transcriptional regulator that represses its own expression, few have constitutive expression  
22 of the regulator, and none display positive autoregulation (see Table S1). To better understand the  
23 salient features of each regulatory architecture and how they affect recovery dynamics, we built

1 variants of our kinetic model with FadR under constitutive expression and positive or negative  
2 autoregulation (details in Methods). Simulations of the recovery dynamics in the OFF-state for  
3 varying exposure times in the ON-state suggest that these architectures behave similarly for short  
4 exposure times ( $< 1$  hour), quickly sequestering all the free FadR (Figure 3A, top). For longer  
5 exposure times ( $>1$  hour), model simulations suggest important differences in the dynamics of  
6 sequestered FadR among the various modes of autoregulation. Negative autoregulation shows an  
7 accumulation of sequestered FadR, while positive autoregulation leads to an overall depletion of  
8 sequestered FadR. Constitutive expression causes the total level of sequestered FadR to be  
9 maintained at a constant level (Figure 3A).

10 To elucidate whether these predicted trends are a consequence of the model parameters or  
11 inherently determined by the autoregulatory architecture, we analyzed the model and found  
12 relations for the change in steady state concentrations of total FadR ( $\Delta R_T$ ) in each autoregulatory  
13 architecture (details of derivation in Supplementary Information S5):

$$\text{Negative autoregulation:} \quad \Delta R_T > 0, \quad (1)$$

$$\text{Positive autoregulation:} \quad \Delta R_T < 0, \quad (2)$$

$$\text{Constitutive expression:} \quad \Delta R_T = 0. \quad (3)$$

14 Equations (1), (2) and (3) are valid for any combination of positive parameters, and therefore the  
15 long-term trends observed in Figure 3A are structural properties of the model.

16 To determine the effect of the three regulatory architectures on the recovery time, we  
17 simulated the recovery dynamics of each architecture for varying exposure times and calculated  
18 the recovery time (Figure 3A, bottom). We observe that the overall relation between recovery time  
19 and exposure time is similar across the three architectures (Figure 3A bottom inset). However, for  
20 positive autoregulation we found recovery to be significantly slower for a wide range of exposure

1 times. To test this prediction, we engineered an *E. coli* strain with positively autoregulated FadR  
2 expression by replacing the native *fadR* promoter with one that activated by FadR ( $P_{fadRpo}$ , see  
3 Supplementary information S6), and a  $P_{fadD}$  reporter plasmid. The positively autoregulated reporter  
4 strain (PA-reporter, Tables S5,6) was grown in the ON-state (M9G media + 1mM oleic acid) and  
5 then rapidly switched to the OFF-state (M9G media) after 3, 6 and 9 hours. We measured the *fadD*  
6 expression dynamics (see time course dynamics in S6, Fig. S3), and calculated the respective  
7 recovery times (Figure 3B). Consistent with the trend predicted from the model, recovery times  
8 for the positively autoregulated strain increased with the exposure time of oleic acid in the ON-  
9 state (Figure 3C).

10

### 11 **Negative autoregulation provides a resource-saving recovery strategy**

12 The results in Equations (1) and (3) suggest that constitutive expression and negative  
13 autoregulation can both maintain high amounts of sequestered FadR for long exposure times to  
14 oleic acid. Our earlier results showed that longer exposure times lead to larger pool of sequestered  
15 FadR (Figure S2D), which enables a faster recovery time (Figure 2E, F). We thus asked which  
16 system parameters influence the steady-state pool size of sequestered FadR in these two  
17 architectures. We found that for high concentrations of oleic acid, the steady-state concentration  
18 of sequestered FadR in the ON-state are given by (details in Supplementary Information S7):

$$\text{Negative autoregulation:} \quad \lim_{A \rightarrow \infty} aR = \frac{a_n}{\mu}, \quad (4)$$

$$\text{Constitutive expression:} \quad \lim_{A \rightarrow \infty} aR = \frac{p_c}{\mu}, \quad (5)$$

19 where  $A$  and  $aR$  are the steady state concentrations of acyl-coA and sequestered FadR,  
20 respectively. These results suggest that at high oleic acid concentrations, the amount of sequestered

1 FadR scales linearly with the strength of its own promoter. Simulations of both architectures in the  
2 ON-state induced with high concentration of oleic acid (1mM) and varying promoter strengths, we  
3 found that increasing promoter strength both increases the amount of sequestered FadR in the ON-  
4 state and decreases the recovery time (Figure 4A).

5 The results in Figure 4A also suggest that through tuning of *fadR* promoter strength, in  
6 principle both constitutive expression and negative autoregulation can produce the same recovery  
7 time. We thus sought to identify potential benefits of one architecture over the other in terms of  
8 the recovery dynamics in the OFF-state. Since production of FadR entails a biosynthetic cost, we  
9 compared both regulatory architectures in terms of the cost of FadR synthesis. From time-course  
10 simulations of FadR synthesis rates in the ON- and OFF- states (Figure 4B), we computed the total  
11 amount of synthesized FadR for increasing *fadR* promoter strengths by integrating the area under  
12 the curves (Figure 4C). Our results show that both architectures require identical biosynthetic costs  
13 for FadR in the ON-state, but negative autoregulation leads to a reduced biosynthetic cost for FadR  
14 in the OFF-state as compared to constitutive expression (Figure 4C).

15

## 16 Discussion

17 In this paper we combined mathematical modelling and experiments to study metabolic pathway  
18 recovery upon depletion of an external nutrient. Changes in nutrient conditions trigger  
19 transcriptional programs that adapt cell physiology [19] to meet the cellular energy budget [20].  
20 We chose the regulation of fatty acid uptake in *E. coli* as our model system, as it is representative  
21 of a widely conserved transcriptional program for controlling the uptake of nutrients in bacteria  
22 (Table S1). We show that fast recovery after nutrient depletion can be achieved by rapid release  
23 of a transcriptional regulator from a metabolite-sequestered complex. In particular, a sizable

1 contribution of FadR rapidly made available after oleic acid depletion came from its release from  
2 its sequestered complex form (aR), as opposed to new synthesis. The rapid availability of FadR  
3 quickly recovers its inhibition on the *fad* regulon, and so shortens the recovery time. Furthermore,  
4 our model simulations and experiments have demonstrated that increasing the amount of FadR  
5 stored in complex form during nutrient exposure and fast consumption of acyl-CoA (the  
6 sequestering metabolite) facilitate a speedy recovery in the OFF-state.

7 Our model simulations show that pathway recovery is delayed by high intracellular acyl-CoA  
8 concentrations, which slow the release of free FadR from stored complex until those high  
9 concentrations are reduced. This delay occurs because FadR is only able to sense the intracellular  
10 metabolite concentrations, which can remain high even when extracellular metabolite  
11 concentrations are low. During this delay, wasteful expression of the uptake pathway continues  
12 despite the absence of oleic acid in the environment. Previous research has shown that upon  
13 nutrient induction, metabolite dynamics tend to lag behind slow upregulation of metabolic  
14 enzymes [13]. In contrast, here we find that after inducer depletion, the recovery of metabolic  
15 enzymes back to their downregulated state lags behind the metabolite dynamics. This has  
16 important implications for designing synthetic control circuits which utilize non-metabolizable  
17 inducers such as IPTG or TMG. Without consumption of the inducer, post-induction recovery  
18 response will be slow and may cause a dramatic drain of cellular resources. Our simulations of the  
19 relation between sequestered FadR and recovery time suggest that this inherent lag can be  
20 compensated for by storing and releasing higher amounts of TF, which highlights the benefits of  
21 maintaining a sequestered pool of FadR.

22 Further mathematical analyses revealed principles that explain how autoregulation shapes the  
23 recovery time. We found that systems with only negative autoregulation and constitutive

1 expression can maintain the pool of sequestered FadR needed for a rapid recovery. In contrast, we  
2 found that positive autoregulation loses this storage over time, resulting in a reduced availability  
3 of FadR after nutrient depletion and slower recovery times. We additionally found that negative  
4 autoregulation of the transcription factor reduces the total biosynthetic cost of for FadR in a full  
5 ON-OFF-state cycle as compared to using constitutive expression. This occurs because both  
6 systems need to maintain the same level of sequestered FadR in the ON-state in order to achieve  
7 the same recovery time, but only negative autoregulation allows FadR synthesis to be down-  
8 regulated in the OFF-state. Thus, negative autoregulation provides a resource-saving strategy for  
9 controlling the recovery dynamics compared to constitutive expression. We found that the  
10 transcriptional regulators in 13 out of 18 nutrient uptake systems (see Table S1) have negative  
11 autoregulation, suggesting an evolutionary pressure for a resource-saving control strategy. Past  
12 studies in the literature have found that expression under negative autoregulation can decrease  
13 response times in gene expression [12], linearize dose-response in responsive systems [21], and  
14 even speed up metabolic dynamics [13]. In addition to these properties, we find that negative  
15 autoregulation enables a rapid and more resource-saving metabolic recovery to nutrient depletion.

16 Recent efforts in synthetic biology focus on engineering gene control circuits to manipulate  
17 microbial metabolism [22]–[24]. One key goal of such control systems is to rapidly turn off  
18 metabolic pathways in response to metabolic signals [25]–[27]. Our results provide core design  
19 principles for engineered metabolic systems with tunable response to nutrient depletions, which  
20 could be used as a pathway control tool in bioreactors. Our experiments and simulations reveal  
21 that the recovery time can be simply tuned through well-established promoter engineering  
22 techniques [28]–[30]. Further, we identify regulatory architectures with differing dynamic  
23 responses to nutrient depletion provides further avenues for tuning system response to the highly

1 dynamic and heterogeneous environments typical of large-scale fermenters. These design rules  
2 can be readily applied to mitigate against deleterious nutrient fluctuations found in metabolic  
3 engineering applications.

4

## 5 **Materials and Methods**

6 **Materials.** Phusion DNA polymerase, T4 DNA ligase, restriction enzymes, and Teknova 5x M9  
7 minimal salts were purchased from Thermo Fisher Scientific (Waltham, MA, USA). Gel  
8 purification and plasmid miniprep kits were purchased from iNtRON Biotechnology (Lynnwood,  
9 WA, USA.). Oligonucleotides were synthesized by Integrated DNA Technologies (Coralville, IA,  
10 USA). All other reagents were purchased from Sigma-Aldrich (St. Louis, MO, USA.)

11

12 **Plasmids, strains, and genome modifications.** A list of plasmids used along with promoter  
13 sequences in this study is provided in Supplementary Information S7 (Tables S4 and S5). *E. coli*  
14 DH10 $\beta$  was used for plasmid construction. The plasmid pSfadDk-rfp was constructed by cloning  
15 the *fadD* promoter (500 bp upstream of its translation start site) into the 5' of a *rfp* gene in a  
16 BglBrick vector, pBbSk-rfp [31] using Golden Gate DNA Assembly [32]. The positively  
17 autoregulated *fadR* strain was engineered by replacing *fadR*'s native promoter with a FadR-  
18 activated promoter  $P_{fadRpo}$  via CRISPR-Cas9 genome editing [33]. Detailed engineering methods  
19 and the characterization of the  $P_{fadRpo}$  promoter are described in Supplementary Information S8.

20 Three reporter strains were created to measure expression dynamics from the *fadD* promoter.  
21 These strains were created by transforming plasmid pSfadDk-rfp into either the wild-type DH1  
22 strain, DH1( $\Delta$ fadE), or an engineered strain with positively autoregulated *fadR*, resulting in WT-  
23 reporter,  $\Delta$ fadE-reporter, and PA-reporter, respectively.

1  
2 **Media conditions.** All strains were grown from single colonies and cultivated overnight in Luria-  
3 Bertani (LB) media before experiments. For OFF-State culture conditions, cells were grown in M9  
4 minimal media [34] supplemented with 1% glycerol and 0.5% Tergitol Solution Type NP-40  
5 (M9G). For ON-state culture conditions, cells were grown in M9G + 1 mM oleic acid (M9G+OA).  
6 All cultures were supplemented with appropriate antibiotic selection (50 mg/L Kanamycin, 100  
7 mg/L Ampicillin).

8  
9 **Assays of *fadD* expression dynamics.** To measure the recovery dynamics, reporter strains were  
10 grown in 3 mL M9G+OA for 24-48 hours at exponential growing state. To rapidly switch nutrient,  
11 cells were centrifuged (5500 rcf, 2 minutes) and washed twice in M9G. Cultures were then diluted  
12 in M9G medium to  $OD_{600} = 0.08$  and transferred to a Falcon 96-Well Imaging Microplate  
13 (Corning, NY, USA). The microplate was then incubated in an Infinite F200PRO plate reader  
14 (TECAN, Männedorf, Switzerland) at 37°C with constant shaking. To maintain exponential  
15 growth during measurement, cultures were diluted by a factor of 5 for three times during  
16 incubation. Kinetic measurements of cell density (absorbance at 600 nm) and RFP fluorescence  
17 (excitation:  $584 \pm 9$  nm, emission:  $620 \pm 20$  nm) were taken every 900 seconds until all diluted  
18 cultures reached stationary phase. Fluorescence from water in the same 96-well plate was used as  
19 the background and was subtracted from all fluorescence measurements. The background-  
20 corrected fluorescence was later normalized by cell density. To calculate the recovery time, the  
21 average of three biological replicates were fitted to an exponential curve:

$$F = a \times e^{-b*t} + c$$

22 where  $F$  is the background-corrected, cell-density-normalized fluorescence. The recovery time  
23 was calculated as  $\tau_{50} = \log(2)/b$ .  
24

1 For switches after defined times in the ON-state, cultures were first grown in exponential  
 2 growth phase for 24-28 hours in M9G. Samples from these cultures were then centrifuged (5500  
 3 rcf, 2 minutes) and suspended in M9G+OA with an initial OD<sub>600</sub> of 0.08 and cultivated in 96-well  
 4 plates for various amount of time as indicated.

5  
 6 **Kinetic model of fatty acid uptake.** To study the dynamic response to oleic acid exposure (ON-  
 7 state) and its recovery (OFF-state) (Fig. 1C), we built a kinetic model of the fatty acid uptake  
 8 system. We define the model as a system of ODEs describing the rate of change of each species:

$$\frac{dR}{dt} = P_R(R, p_r) - k_f \cdot R \cdot A^2 + k_r \cdot aR - \mu \cdot R, \quad (6)$$

$$\frac{dD}{dt} = b_D + \frac{a_D}{1+(K_D \cdot R)^2} - \mu \cdot D, \quad (7)$$

$$\frac{dA}{dt} = \frac{k_{cat,D} \cdot OA}{K_{m,D} + OA} \cdot D - \frac{k_{cat,B} \cdot A}{K_{m,B} + A} \cdot B - 2 \cdot (k_f \cdot R \cdot A^2 - k_r \cdot aR) - \mu \cdot A, \quad (8)$$

$$\frac{daR}{dt} = k_f \cdot R \cdot A^2 - k_r \cdot aR - \mu \cdot aR, \quad (9)$$

9 where  $R$ ,  $D$ ,  $A$  and  $aR$  represent the concentrations of transcription factor FadR, uptake enzyme  
 10 FadD, internalized fatty acid acyl-CoA, and sequestered complex acyl-CoA-FadR, respectively  
 11 (Fig.1B). The reversible sequestering of one FadR dimer by two acyl-CoA molecules  
 12 (stoichiometry as defined in [35]) is modeled as mass-action kinetics in the term  $k_f R A^2 - k_r aR$ .  
 13 The term  $P_R(R, p_r)$  represents the expression and autoregulation of the fadR promoter. To model  
 14 FadR negative autoregulation for the wild-type strain, we use:

$$P_{R,n} = b_n + \frac{a_n}{1+K_n \cdot R}, \quad (10)$$

15 To fit model parameters, we first extended the model to simulate batch culture, and then applied a  
 16 least-squares fitting of simulations to time course measurements of RFP fluorescence expressed

1 under a *fadD* promoter, from strain  $\Delta$ *fadE*, in various concentrations of oleic acid (see details in  
2 Supplementary Information S2 and Table S2). Fitted parameter values are reported in Table S3,  
3 and were used throughout this study, unless otherwise stated. To understand the impact of model  
4 parameters on the recovery time, we performed global parameter sensitivity analysis (details in  
5 Supplementary Information S8). To model the strains with positive autoregulation and constitutive  
6 expression of *FadR*, we use:

$$P_{R,p} = b_p + \frac{a_p \cdot K_p \cdot R}{1 + K_p \cdot R}, \quad (2)$$

$$P_{R,c} = p_c, \quad (3)$$

7 **Model simulations.** The model was solved with the MATLAB R2018a ODE solver suite. To  
8 simulate the ON-state: simulations were initialized using steady state values achieved from  
9 simulations of the preculture (oleic acid, OA = 0  $\mu$ M), and setting a constant oleic acid  
10 concentration of 1000  $\mu$ M. Simulations were then run for a defined exposure time. To simulate the  
11 OFF-state: the system was initialized from the state achieved at the end of the ON-state, and oleic  
12 acid set to 0  $\mu$ M. Simulations were then run to steady state, and recovery times were calculated as  
13 the time from the start of the OFF-state till *FadD* reached half-way between its initial value and  
14 minimum steady state value. To calculate the cost of *FadR* synthesis in the ON and OFF-states  
15 (Fig. 4C), we integrated simulations of *FadR* synthesis rate over 48hrs in each state.

16 In Figure 3, for fair comparison model parameters are set such that the steady state concentration  
17 of *FadR* is the same for all three architectures prior to switching to the ON-state. Likewise, in  
18 Figure 4B-C for fair comparison, *fadR* promoter strengths for both architectures were set to achieve  
19 same concentration of sequestered *FadR* in the ON-state (and thus equal recovery times).

20

## 1 **Acknowledgements**

2 This work was funded by the Human Frontier Science Program through a Young Investigator  
3 Grant awarded to F.Z. and D.O (grant no. RGY-0076-2015) and by the US National Science  
4 Foundation (MCB1453147) to F.Z.

## 6 **Author contributions**

7 C.J.H. and F.Z. designed experiments. A.A.M and D.A.O. designed the mathematical  
8 analysis. C.J.H. and D.L. engineered strains, carried out experiments, and interpreted the data.  
9 A.A.M. developed models, parameter fitting and sensitivity analysis, and model analyses. F.Z. and  
10 D.A.O. designed and supervised the study. All authors drafted the manuscript.

## 12 **References**

- 13 [1] I. Piazza *et al.*, “A Map of Protein-Metabolite Interactions Reveals Principles of Chemical  
14 Communication,” *Cell*, vol. 172, no. 1–2, pp. 358–372.e23, Jan. 2018.
- 15 [2] G. Lambert, E. Kussell, and E. Kussel, “Memory and fitness optimization of bacteria under  
16 fluctuating environments,” *PLoS Genet.*, vol. 10, no. 9, p. e1004556, Sep. 2014.
- 17 [3] A. Solopova *et al.*, “Bet-hedging during bacterial diauxic shift,” *Proc. Natl. Acad. Sci. U. S. A.*,  
18 vol. 111, no. 20, pp. 7427–32, May 2014.
- 19 [4] S. M. Amato, M. A. Orman, and M. P. Brynildsen, “Metabolic Control of Persister Formation in  
20 *Escherichia coli*,” *Mol. Cell*, vol. 50, no. 4, pp. 475–487, May 2013.
- 21 [5] O. Kotte, B. Volkmer, J. L. Radzikowski, and M. Heinemann, “Phenotypic bistability in  
22 *Escherichia coli*’s central carbon metabolism,” *Mol. Syst. Biol.*, vol. 10, no. 7, p. 736, Jan. 2014.
- 23 [6] E. Dekel and U. Alon, “Optimality and evolutionary tuning of the expression level of a protein,”  
24 *Nature*, vol. 436, no. 7050, pp. 588–92, Jul. 2005.

- 1 [7] T. Kalisky, E. Dekel, and U. Alon, “Cost-benefit theory and optimal design of gene regulation  
2 functions.,” *Phys. Biol.*, vol. 4, no. 4, pp. 229–45, Nov. 2007.
- 3 [8] O. Kotte, J. B. Zaugg, and M. Heinemann, “Bacterial adaptation through distributed sensing of  
4 metabolic fluxes,” *Mol. Syst. Biol.*, vol. 6, Mar. 2010.
- 5 [9] C.-S. Chin, V. Chubukov, E. R. Jolly, J. DeRisi, and H. Li, “Dynamics and design principles of a  
6 basic regulatory architecture controlling metabolic pathways.,” *PLoS Biol.*, vol. 6, no. 6, p. e146,  
7 Jun. 2008.
- 8 [10] V. Chubukov, I. A. Zuleta, and H. Li, “Regulatory architecture determines optimal regulation of  
9 gene expression in metabolic pathways,” *Proc. Natl. Acad. Sci.*, vol. 109, no. 13, pp. 5127–5132,  
10 Mar. 2012.
- 11 [11] U. Alon, “Network motifs: theory and experimental approaches.,” *Nat. Rev. Genet.*, vol. 8, no. 6,  
12 pp. 450–61, Jun. 2007.
- 13 [12] N. Rosenfeld, M. B. Elowitz, and U. Alon, “Negative autoregulation speeds the response times of  
14 transcription networks.,” *J. Mol. Biol.*, vol. 323, no. 5, pp. 785–93, Nov. 2002.
- 15 [13] D. Liu and F. Zhang, “Metabolic Feedback Circuits Provide Rapid Control of Metabolite  
16 Dynamics.,” *ACS Synth. Biol.*, vol. 7, no. 2, pp. 347–356, Feb. 2018.
- 17 [14] E. Klipp, R. Heinrich, and H.-G. Holzhütter, “Prediction of temporal gene expression. Metabolic  
18 optimization by re-distribution of enzyme activities.,” *Eur. J. Biochem.*, vol. 269, no. 22, pp. 5406–  
19 13, Nov. 2002.
- 20 [15] A. Zaslaver *et al.*, “Just-in-time transcription program in metabolic pathways.,” *Nat. Genet.*, vol.  
21 36, no. 5, pp. 486–91, May 2004.
- 22 [16] D. A. Oyarzún, B. P. Ingalls, R. H. Middleton, and D. Kalamatianos, “Sequential activation of  
23 metabolic pathways: a dynamic optimization approach.,” *Bull. Math. Biol.*, vol. 71, no. 8, pp.  
24 1851–72, Nov. 2009.
- 25 [17] I. M. Keseler *et al.*, “The EcoCyc database: reflecting new knowledge about Escherichia coli K-  
26 12.,” *Nucleic Acids Res.*, vol. 45, no. D1, pp. D543–D550, Jan. 2017.

- 1 [18] J. E. Cronan, “In vivo evidence that acyl coenzyme A regulates DNA binding by the Escherichia  
2 coli FadR global transcription factor.,” *J. Bacteriol.*, vol. 179, no. 5, pp. 1819–23, Mar. 1997.
- 3 [19] V. Chubukov, L. Gerosa, K. Kochanowski, and U. Sauer, “Coordination of microbial  
4 metabolism.,” *Nat. Rev. Microbiol.*, vol. 12, no. 5, pp. 327–40, May 2014.
- 5 [20] A. Y. Weisse, D. A. Oyarzún, V. Danos, and P. S. Swain, “Mechanistic links between cellular  
6 trade-offs, gene expression, and growth,” *Proc. Natl. Acad. Sci.*, vol. 112, no. 9, pp. E1038–  
7 E1047, Feb. 2015.
- 8 [21] D. Madar, E. Dekel, A. Bren, and U. Alon, “Negative auto-regulation increases the input dynamic-  
9 range of the arabinose system of Escherichia coli.,” *BMC Syst. Biol.*, vol. 5, no. 1, p. 111, Jul.  
10 2011.
- 11 [22] Y. Lv, S. Qian, G. Du, J. Chen, J. Zhou, and P. Xu, “Coupling feedback genetic circuits with  
12 growth phenotype for dynamic population control and intelligent bioproduction.,” *Metab. Eng.*,  
13 vol. 54, pp. 109–116, Jul. 2019.
- 14 [23] A. Gupta, A. Miliias-Argeitis, and M. Khammash, “Dynamic disorder in simple enzymatic  
15 reactions induces stochastic amplification of substrate.,” *J. R. Soc. Interface*, vol. 14, no. 132, Jul.  
16 2017.
- 17 [24] D. Liu, A. A. Mannan, Y. Han, D. A. Oyarzún, and F. Zhang, “Dynamic metabolic control:  
18 towards precision engineering of metabolism,” *J. Ind. Microbiol. Biotechnol.*, no. 0123456789,  
19 2018.
- 20 [25] A. Gupta, I. M. B. Reizman, C. R. Reisch, and K. L. J. Prather, “Dynamic regulation of metabolic  
21 flux in engineered bacteria using a pathway-independent quorum-sensing circuit.,” *Nat.*  
22 *Biotechnol.*, vol. 35, no. 3, pp. 273–279, Mar. 2017.
- 23 [26] B.-J. Harder, K. Bettenbrock, and S. Klamt, “Temperature-dependent dynamic control of the TCA  
24 cycle increases volumetric productivity of itaconic acid production by Escherichia coli.,”  
25 *Biotechnol. Bioeng.*, vol. 115, no. 1, pp. 156–164, Jan. 2018.
- 26 [27] F. Moser, A. Espah Borujeni, A. N. Ghodasara, E. Cameron, Y. Park, and C. A. Voigt, “Dynamic

- 1 control of endogenous metabolism with combinatorial logic circuits,” *Mol. Syst. Biol.*, vol. 14, no.  
2 11, 2018.
- 3 [28] H. Alper, C. Fischer, E. Nevoigt, and G. Stephanopoulos, “Tuning genetic control through  
4 promoter engineering.,” *Proc. Natl. Acad. Sci. U. S. A.*, vol. 102, no. 36, pp. 12678–83, Sep. 2005.
- 5 [29] F. Zhang, J. M. Carothers, and J. D. Keasling, “Design of a dynamic sensor-regulator system for  
6 production of chemicals and fuels derived from fatty acids,” *Nat. Biotechnol.*, vol. 30, no. 4, pp.  
7 354–9, Mar. 2012.
- 8 [30] A. A. Mannan, D. Liu, F. Zhang, and D. A. Oyarzún, “Fundamental Design Principles for  
9 Transcription-Factor-Based Metabolite Biosensors,” *ACS Synth. Biol.*, vol. 6, no. 10, pp. 1851–  
10 1859, Oct. 2017.
- 11 [31] T. S. Lee *et al.*, “BglBrick vectors and datasheets: A synthetic biology platform for gene  
12 expression.,” *J. Biol. Eng.*, vol. 5, no. 1, p. 12, Sep. 2011.
- 13 [32] C. Engler, R. Kandzia, and S. Marillonnet, “A one pot, one step, precision cloning method with  
14 high throughput capability.,” *PLoS One*, vol. 3, no. 11, p. e3647, Nov. 2008.
- 15 [33] Y. Jiang, B. Chen, C. Duan, B. Sun, J. Yang, and S. Yang, “Multigene Editing in the Escherichia  
16 coli Genome via the CRISPR-Cas9 System,” *Appl. Environ. Microbiol.*, vol. 81, no. 7, pp. 2506–  
17 2514, Apr. 2015.
- 18 [34] D. Liu, Y. Xiao, B. S. Evans, and F. Zhang, “Negative feedback regulation of fatty acid production  
19 based on a malonyl-CoA sensor-actuator,” *ACS Synth. Biol.*, vol. 4, no. 2, pp. 132–140, 2015.
- 20 [35] D. M. van Aalten, C. C. DiRusso, J. Knudsen, and R. K. Wierenga, “Crystal structure of FadR, a  
21 fatty acid-responsive transcription factor with a novel acyl coenzyme A-binding fold.,” *EMBO J.*,  
22 vol. 19, no. 19, pp. 5167–77, Oct. 2000.
- 23
- 24

## 1 Figures



2

3 **Figure 1. General architecture of a bacterial nutrient uptake system.** (A) Regulation of

4 nutrient uptake by a metabolite-responsive transcription factor, a ubiquitously observed control

5 system in bacteria (Table S1). (B) We use the *Escherichia coli* fatty acid uptake as a model system.

6 The ON-state is defined by induction at a constant level of oleic acid, which is imported as acyl-

7 CoA by uptake enzyme FadD. Acyl-CoA sequesters the transcription factor FadR, which de-

8 represses expression of the uptake enzyme. The OFF-state is defined by the wash out of oleic acid

9 after some time  $t_0$  in the ON-state. Release of sequestered FadR recovers its repression on FadD

10 synthesis. FadR is also subject to negative autoregulation. (C) Schematic of the experiments and

11 simulations in this work, with defined exposure time to oleic acid (green area), and recovery time

12 of FadD levels in the OFF-state ( $\tau_{50}$ ) defined as the time to reach to half way between maximum

13 and minimum concentrations.



1  
 2 **Figure 2. Nutrient exposure time and speed of metabolite consumption in the OFF-state**  
 3 **shape the recovery time.** (A) Predicted recovery time ( $\tau_{50}$ ) and proportion of free FadR released  
 4 from sequestration after one doubling time ( $\eta$ ) for variations in the amount of consuming enzyme  
 5 and nutrient exposure time. (B) Inverse relation between the proportion of released FadR ( $\eta$ ) and  
 6 predicted recovery time. (C) Simulated time course of FadD concentration during OFF-state and  
 7 predicted recovery times for increasing concentration of acyl-CoA consuming enzyme. (D)  
 8 Measured time course of *fadD* expression when switching from ON- to OFF-state for strains with

1 low ( $\Delta fadE$ -reporter) and high (WT-reporter) concentration of acyl-CoA consuming enzyme.  
2 Strains were switched from M9G+1mM oleic acid to M9G media at time zero. Error bars represent  
3 standard error of the mean (SEM) from biological triplicates (n=3). Recovery times were  
4 calculated from exponential fits to each of the triplicate time course data (inset). Error bars  
5 represent SEM from biological triplicates (n=3). (E) Time course simulations of FadD induction  
6 and recovery dynamics, and predicted recovery times, for increasing exposure times. (F) Measured  
7 time course of *fadD* expression from the WT-reporter strain grown for 3, 6 and 9 hours of exposure  
8 to oleic acid (M9G+1mM oleic acid), and then switched to OFF-state (M9G). Error bars represent  
9 SEM from biological triplicates (n=3). Recovery times were again calculated from exponential  
10 fits, with error bars SEM from triplicates (n=3).

1



2

3 **Figure 3. Impact of regulatory architecture on the recovery time after nutrient depletion.** (A,

4 top) Simulated steady state concentrations of sequestered (thick line) and total FadR (thin line) for

5 varying times spent in the ON-state for three regulatory architectures of FadR; constitutive

6 expression (black line) is represented by a blunt line. (A, bottom) Predicted recovery times for

7 each architecture. (B) Measured recovery times in the WT (WT-reporter) and positively

8 autoregulated strain (PA-reporter, Supplementary Table 6) for 3, 6 and 9 hours of exposure in ON-

9 state. Recovery times were calculated from exponential fits to each of the triplicate time course

10 data (data in Supplementary Information S6) and error bars represent SEM of the calculated values

11 (n=3). (C) Schematics illustrating how negative and positive autoregulation affect the build-up of

12 sequestered FadR in the ON-state.



1  
2 **Figure 4. Comparison of recovery dynamics in constitutive expression and negative**  
3 **autoregulation.** (A) Simulated recovery times for variations in the strength of FadR's own  
4 promoter, with both architectures achieving the same recovery times. (B) Time course simulations  
5 of FadR synthesis rates for 48 hours in the ON-state (1mM oleic acid) and OFF-state, for increasing  
6 promoter strengths; yellow curve represents response with the fitted promoter strength value  
7 (Table S3). To ensure fair comparison, promoter strengths were chosen to achieve the same  
8 recovery time in the two architectures. (C) Cost of FadR synthesis for increasing concentrations  
9 of sequestered FadR, modified by changes to *fadR* promoter strength. Circles correspond to costs  
10 associated to simulations shown in (B). Details of simulations in Methods.
